# Supplementary material for: β-hydroxybutyrate potentiates anti-tumor immunity by modulating cytotoxic CD8+ T cell responses
Source: Research Square preprint supplement (doi:10.21203/rs.3.rs-8428666/v1), 2026-01-08
Supplement: Supplementary file 1 [file 18e47d328f8e735fc78da2b7.docx]

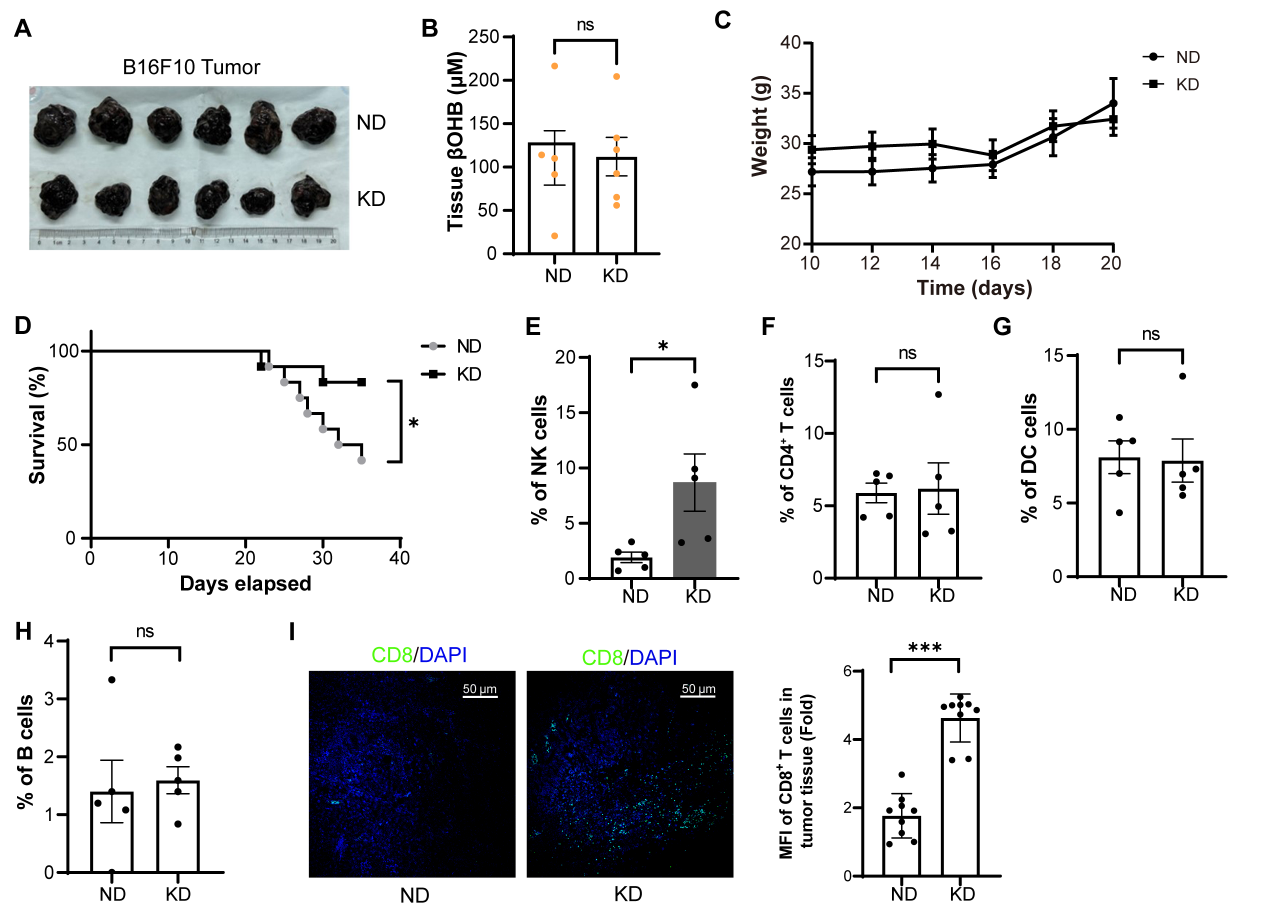


**Fig. S1. Impact of KD on tumor growth and immune cells within the TME**

**(A)** Tumor sizes of B16F10 melanoma-bearing mice fed a KD or ND diet (n=6/group). **(B)** βOHB concentrations in tumor tissues of B16F10-bearing mice fed a KD or ND diet (n=5/group). **(C)** Body weight curves of B16F10-bearing mice fed a KD or ND diet (n=5/group). **(D)** Long-term survival of B16F10-bearing mice fed a KD or ND diet (n=12/group). (**E-H**) Bar graphs showing the percentage of NK (natural killer), CD4+ T, DC (dendritic cells) and B cells in CD45+ cells isolated from mouse tumor tissues, as analyzed by flow cytometry (n=5/group). (**I**) Representative immunofluorescent staining of CD8+ T cells in tumor sections from B16F10-bearing mice fed a KD or ND diet. Bar graphs show the quantitative analysis of CD8 fluorescence intensity. MFI, mean fluorescence intensity; scale bar, 50 μm. Data are presented as the mean ± SEM. * P<0.05.


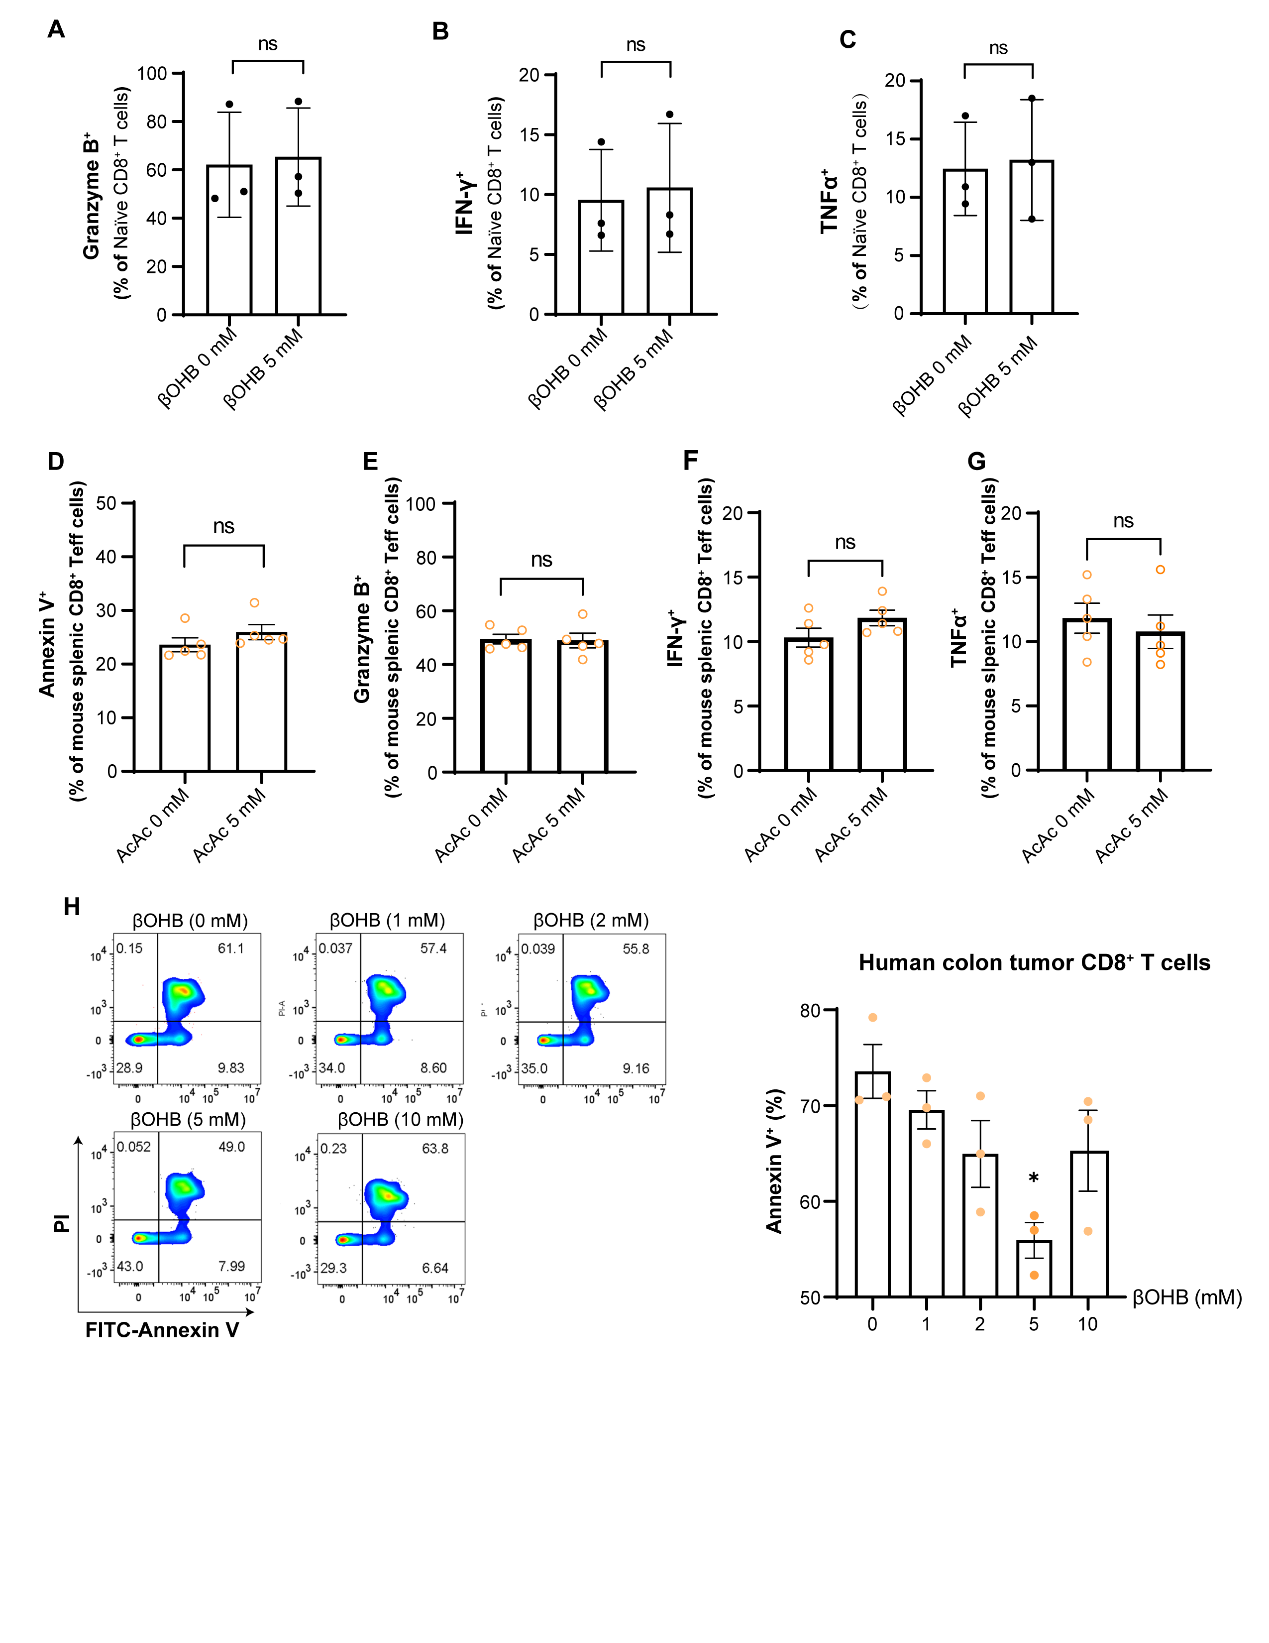


**Fig. S2. Comparison of the effect of βOHB and AcAc on CD8+ T cells**

**(A-C)** Bar graphs showing the percentage of granzyme B+, IFN-γ+, and TNFα+ CD8+ T cells isolated from mouse spleen (naïve CD8+ T cells) treated with 0 and 5 mM βOHB, as analyzed by flow cytometry (n=3/group). **(D)** Bar graphs showing the apoptotic cell ratios of activated mouse splenic CD8+ T cells treated with 0 and 5 mM AcAc, as analyzed by flow cytometry (n=5/group). **(E-G)** Bar graphs showing the percentage of Granzyme B+, IFN-γ+, and TNFα+ activated mouse splenic CD8+ T cells treated with 0 and 5 mM AcAc, as analyzed by flow cytometry (n=5/group). **(H)** FITC-Annexin V/propidium iodide (PI) flow cytometry analysis of CD8+ T cells isolated from human colon cancer and treated with varying concentrations of βOHB (0-10 mM). Bar graphs show the quantitative analysis of apoptotic cell ratios (n=3/group). Data are presented as the mean ± SEM. * P<0.05.


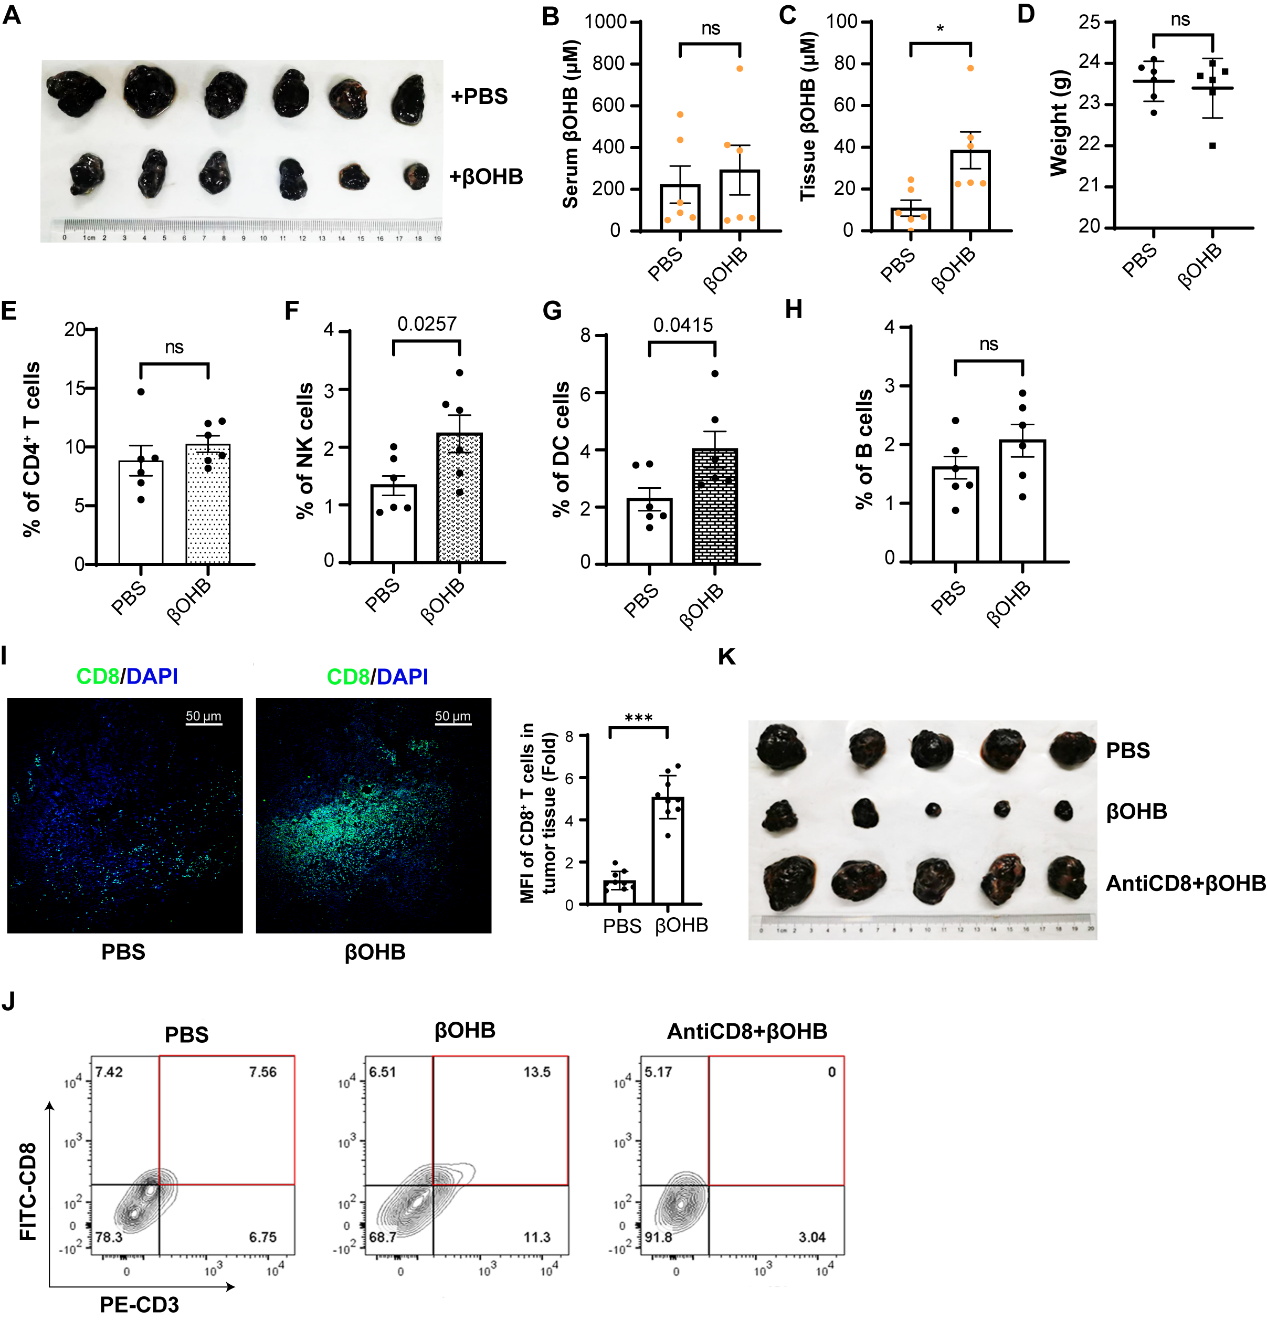


**Fig. S3. Effects of βOHB treatment on B16F10 tumor growth and immune cells within the TME**

**(A)** Tumor size of B16F10-bearing mice treated with PBS or βOHB (n=6/group). **(B-C)** Serum and tumor tissue βOHB concentrations in B16F10-bearing mice treated with PBS or βOHB (n=6/group). **(D)** Body weight of B16F10-bearing mice treated with PBS or βOHB (n=6/group). **(E-H)** Bar graphs showing the percentage of NK, CD4+ T, DC and B cells in CD45+ cells isolated from B16F10-bearing mice treated with PBS or βOHB, as analyzed by flow cytometry (n=6/group). **(I)** Representative immunofluorescent staining of CD8+ T cells in tumor sections from B16F10-bearing mice treated with PBS or βOHB. Bar graphs show the quantitative analysis of CD8 fluorescence intensity. MFI, mean fluorescence intensity; scale bar, 50 μm. **(J)** Flow cytometry analysis of CD8+ T cells isolated from B16F10-bearing mice treated with PBS, βOHB, or βOHB combined with anti-CD8 antibody-mediated CD8+ T cell depletion. **(K)** Tumor size of B16F10-bearing mice treated with PBS, βOHB, or βOHB combined with anti-CD8 antibody-mediated CD8+ T cell depletion (n=6/group). Data are presented as the mean ± SEM. * P<0.05.


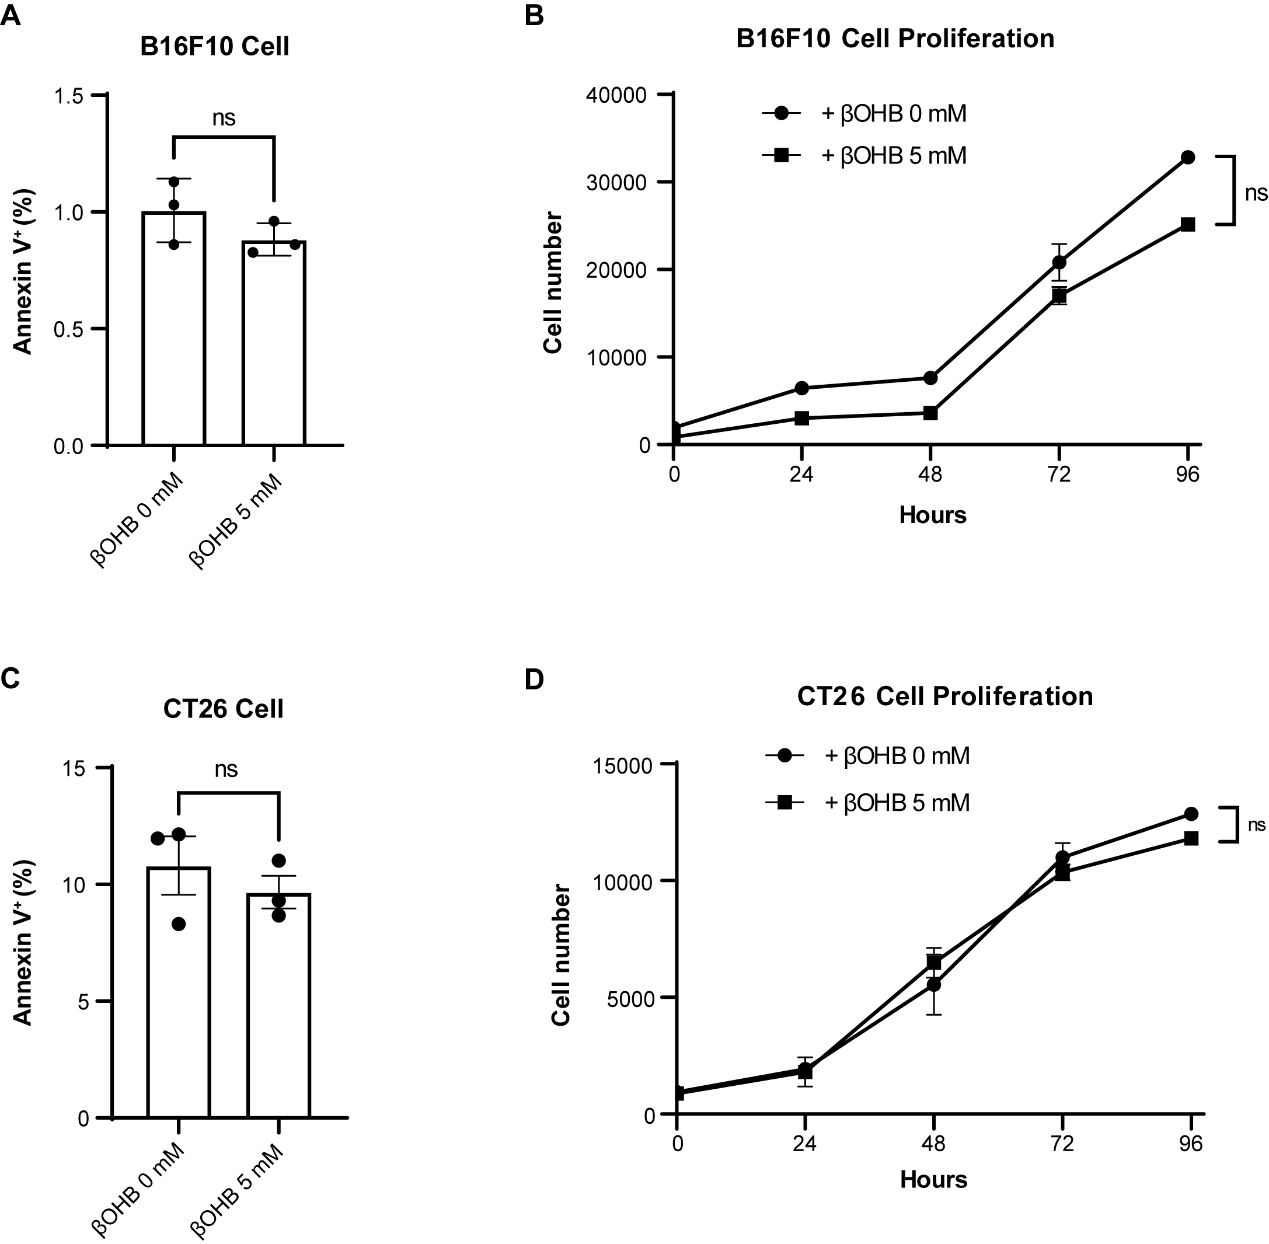


**Fig. S4. Effects of βOHB on the proliferation and apoptosis of cancer cells**

**(A-B)** Apoptosis and proliferation of B16F10 melanoma cells were analyzed under βOHB treatment (n=3/group). **(C-D)** Apoptosis and proliferation of CT26 colon cancer cells were analyzed under βOHB treatment (n=3/group). Data are presented as the mean ± SEM.


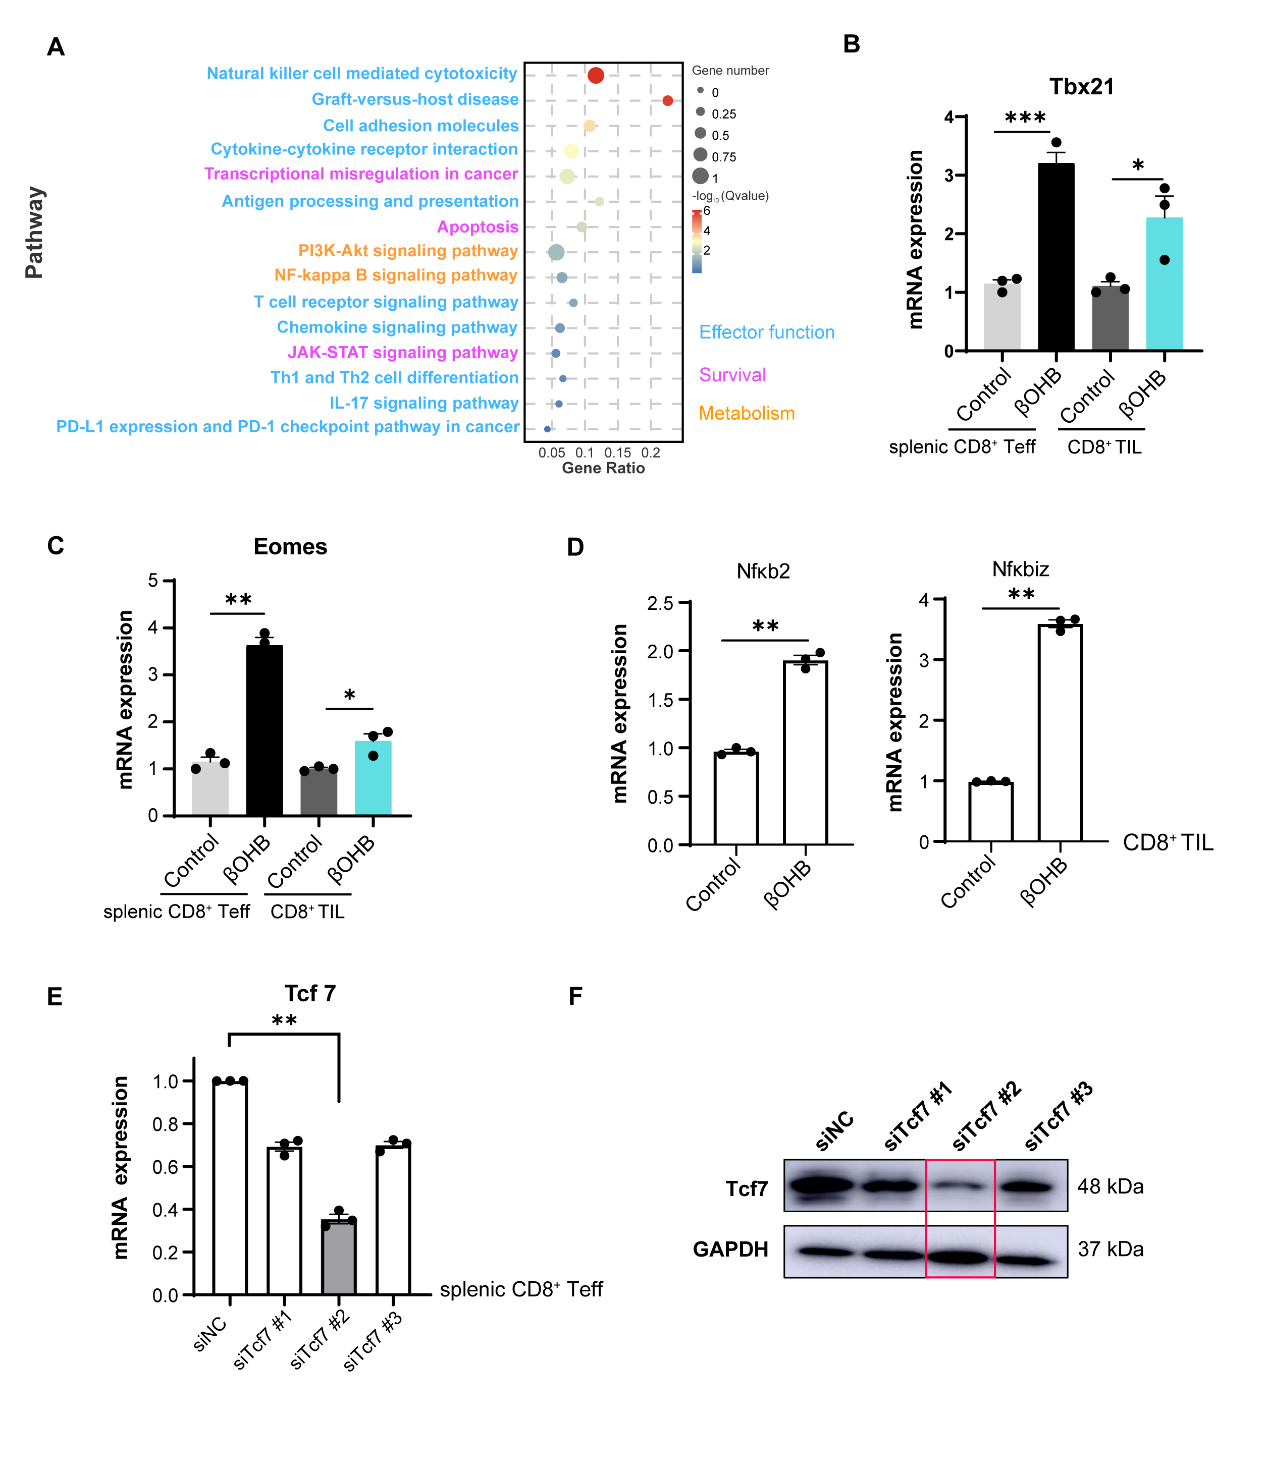


**Fig. S5. RNA-seq analysis of tumor-infiltrating CD8+ T cells treated with βOHB**

**(A)** KEGG pathway enrichment analysis of tumor-infiltrating CD8+ T cells under PBS or βOHB treatment conditions. Pathways associated with effector function, survival, and metabolism are colored in blue, magenta, and orange, respectively. **(B-C)** qPCR analysis of Tbx21 and Eomes mRNA expression in βOHB-treated activated splenic CD8+ T cells and tumor-infiltrating CD8+ T cells (n=3/group). **(D)** Nfκb2 and Nfκbiz mRNA expression in βOHB-treated tumor-infiltrating CD8+ T cells, as analyzedby qPCR (n=3/group). **(E-F)** mRNA and protein expression of Tcf7 in activated splenic CD8+ T cells following knockdown with siTcf7. siTcf7 #2 demonstrated the most effective knockdown and was used for subsequent functional analysis. Data are presented as the mean ± SEM. * P<0.05, ** P<0.01, *** P<0.001.

**
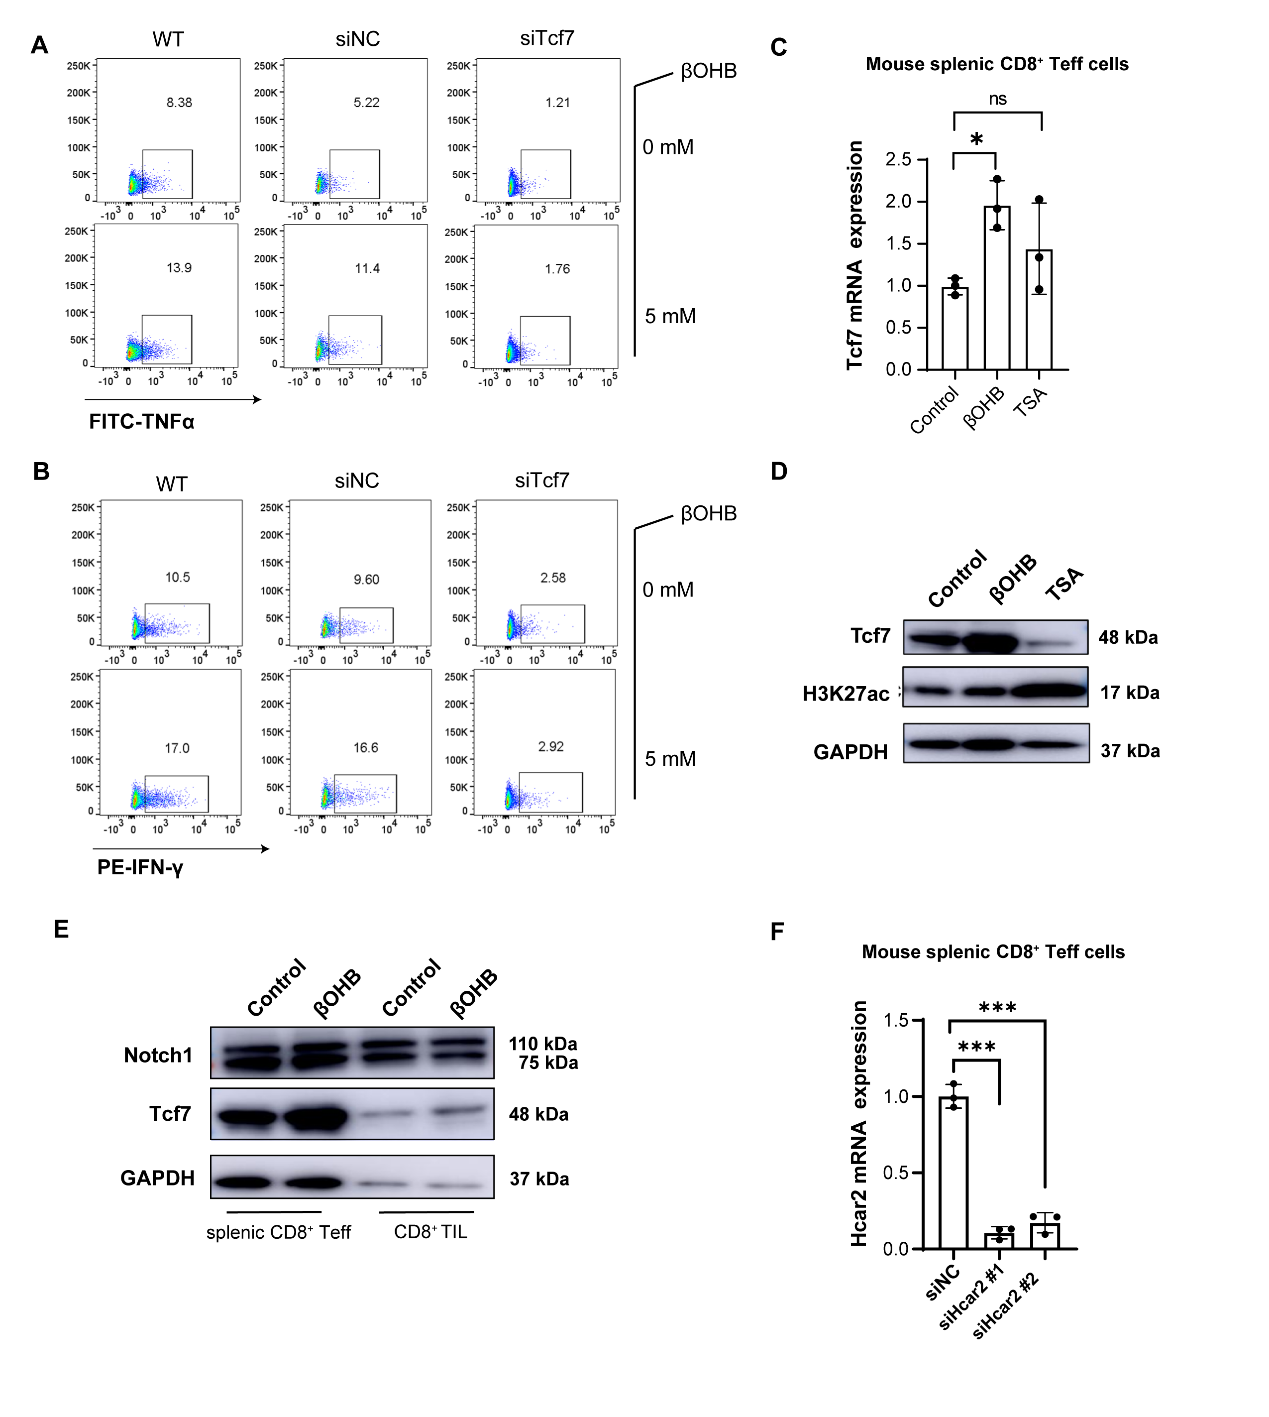
**

**Fig. S6. Molecular mechanism by which βOHB upregulates Tcf7**

**(A-B)** Flow cytometry analysis of TNFα and IFN-γ expression in WT, siNC, and siTcf7 CD8+ T cells with or without βOHB treatment. **(C-D)** mRNA and protein expression of Tcf7, along with histone H3K27ac levels, in CD8+ T cells treated with βOHB or HDAC inhibitor TSA. **(E)** Western blot analysis of Notch1 in βOHB-treated activated splenic CD8+ T cells and tumor-infiltrating CD8+ T cells. **(F)** Hcar2 mRNA expression in activated splenic CD8+ T cells following knockdown with siHcar2.Data are presented as the mean ± SEM. * P<0.05, ** P-value<0.01, *** P<0.001.


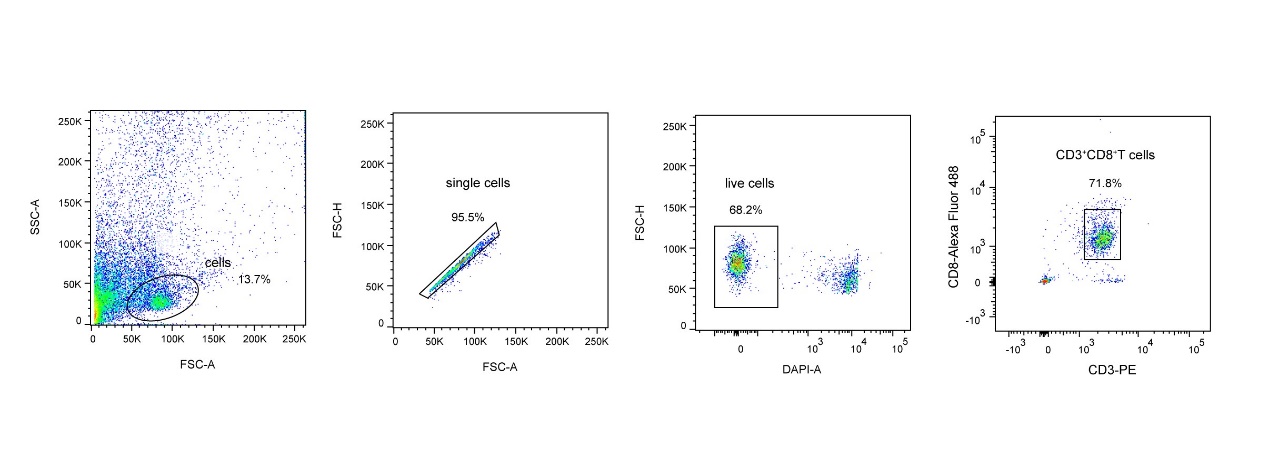


**Fig. S7.** **Purity of tumor-infiltrating CD8⁺ T cells.**

Tumor-infiltrating CD8⁺ T cells were isolated using CD8 MicroBeads (Miltenyi Biotec) by positive magnetic selection according to the manufacturer’s instructions. The purity of the isolated CD8⁺ T cells was subsequently evaluated by flow cytometry (FACS).

**Table S1. Antibodies and Reagent used for Flow cytometry**

| **Antibodies and Reagent** | | **Company Cat. No.** |
| --- | --- | --- |
| FITC-anti-mouseTNF-α (MP6-X7) | BioLegend 506304 | |
| Fixable viability stain 440 UV | BD Biosciences 566332 | |
| APC/Fire™ 750 anti-mouse CD45 (30-F11) | BioLegend 103154 | |
| PE anti-mouse CD3 (17A2) | Biolegend 100206 | |
| PerCP/Cyanine5.5 anti-mouse CD4 (RM4-5) | BioLegend 100540 | |
| FITC anti-mouse CD8a (53-6.7) | BioLegend 100706 | |
| PE/Cyanine7 anti-mouse CD19 (6D5) | BioLegend 115520 | |
| APC anti-mouse NK-1.1 (PK136)  FITC anti-mouse/human CD11b (M1/70)  APC anti-mouse CD11c (N418)  Brilliant Violet 605™ anti-mouse I-A/I-E(M5/114.15.2) | BioLegend 108710  BioLegend 101205  BioLegend 117309  BioLegend 107639 | |
| Ms IFN-Gma PE XMG1.2 | BD Biosciences 554412 | |
| Alexa Fluor 647 anti-human/mouse Granzyme B Antibody (GB11)  Hu IFN-Gma PE B27  Hu TNF- PE R718 MAB11 | BioLegend 515405  BD Biosciences 559327  BD Biosciences 566957 | |
| Purified NA/LE Mouse Anti-Human CD3 | BD Biosciences 555338 | |
| Purified NA/LE Mouse Anti-Human CD28 | BD Biosciences 555725 | |

**Table S2. Primer sequence list**

| **GENE** | **5’-** | **3’-** |
| --- | --- | --- |
| GAPDH | GGCAAATTCAACGGCACAGTCAAG | TCGCTCCTGGAAGATGGTGATGG |
| Tcf7 | AAAGAAGAAGAGGCGGTCAAGGG | AGAGCACTGTCATCGGAAGGAAC |
| Tbx21 | CCAAGTTCAACCAGCACCAGAC | ACCAAGACCACATCCACAAACATC |
| Eomes | AGAACCGTGCCACAGACCAAC | TGCTGGACAGGCGTGACAAG |
| Lck | CGAAGGTGGCGGTGAAGAGTC | GATGTAGATGGGTTCCTGGGTGAC |
| Hcar2 | CCTGACTGTCCACCTCCTCTATAC | ATCGTGCCACCTGAAGTTGTAAC |
| Nfκb2 | ACAGGACGAGAACGGAGACAC | GGTGGTTGGTGAGGTTGATGAC |
| Nfκbiz | TCCTCCGATTTCTCCTCCACTTC | TCTCTGCTGCCTGCCAACC |

**Table S3. Immunoblotting related antibodies**

| **Antibody** | **Dilution** | **Company Cat. No.** |
| --- | --- | --- |
| GAPDH (D16H11) XP® Rabbit mAb (HRP Conjugate) | 1: 2000 | Cell Signaling 8884  Technology |
| TCF1/TCF7 (C63D9) Rabbit mAb | 1: 2000 | Cell Signaling 2203  Technology |
| LCK Rabbit pAb | 1: 2000 | ABclonal A22331 |
| NF-kB p65/RelA Rabbit pAb | 1: 2000 | ABclonal A2547 |
| H3K27ac (EP16602) | 1: 2000 | Abcam ab177178 |
| HRP-conjugated Goat anti-Rabbit IgG (H+L) | 1: 5000 | ABclonal AS014 |
